# Supplementary material for: Sulfoxide-Containing Bisabolane Sesquiterpenoids with Antimicrobial and Nematicidal Activities from the Marine-Derived Fungus Aspergillus sydowii LW09
Source: MDPI journal article supplement (doi:10.3390/jof9030347), 2023-03-12
Supplement: s1 [file s1]

# Sulfoxide-Containing Bisabolane Sesquiterpenoids with Antimicrobial and Nematicidal Activities from the Marine-Derived Fungus *Aspergillus sydowii* LW09

Xiao Yang <sup>1,2,†</sup>, Hongjia Yu <sup>1,2,†</sup>, Jinwei Ren <sup>1</sup>, Lei Cai <sup>1</sup>, Lijian Xu <sup>2,\*</sup> and Ling Liu <sup>1,3,\*</sup>

<sup>1</sup> State Key Laboratory of Mycology, Institute of Microbiology, Chinese Academy of Sciences, Beijing 100101, China; 17633751049@163.com (X.Y.); hongjia718@163.com (H.Y.); renjw@im.ac.cn (J.R.); cail@im.ac.cn (L.C.)

<sup>2</sup> College of Agricultural Resource and Environment, Heilongjiang University, Harbin 150080, China

<sup>3</sup> University of Chinese Academy of Sciences, Beijing 100039, China

\* Correspondence: xulijian@hlju.edu.cn (L.X.), liul@im.ac.cn (L.L.)

† These authors contributed equally to this work.

## List of Supporting Information

**Figure S1.** HRESIMS spectrum of compound **1**.

**Figure S2.** IR spectrum of compound **1**.

**Figure S3.** <sup>1</sup>H NMR (500 MHz, acetone-*d*<sub>6</sub>) spectrum of compound **1**.

**Figure S4.** <sup>13</sup>C NMR (125 MHz, acetone-*d*<sub>6</sub>) spectrum of compound **1**.

**Figure S5.** HSQC spectrum of compound **1**.

**Figure S6.** <sup>1</sup>H-<sup>1</sup>H COSY spectrum of compound **1**.

**Figure S7.** HMBC spectrum of compound **1**.

**Figure S8.** NOESY spectrum of compound **1**.

**Figure S9.** ECD conformers of compound **1**.

**Figure S10.** Microscopy images of *Alternaria alternata* treated by compounds **2**, **3**, and **7** with 128 μg/mL (I–III), the vacuolated germ tubes were circled.

**Figure S11.** Flowchart of the isolation.

**Table S1.** List of specimens and GenBank accession numbers of sequences used in this study.

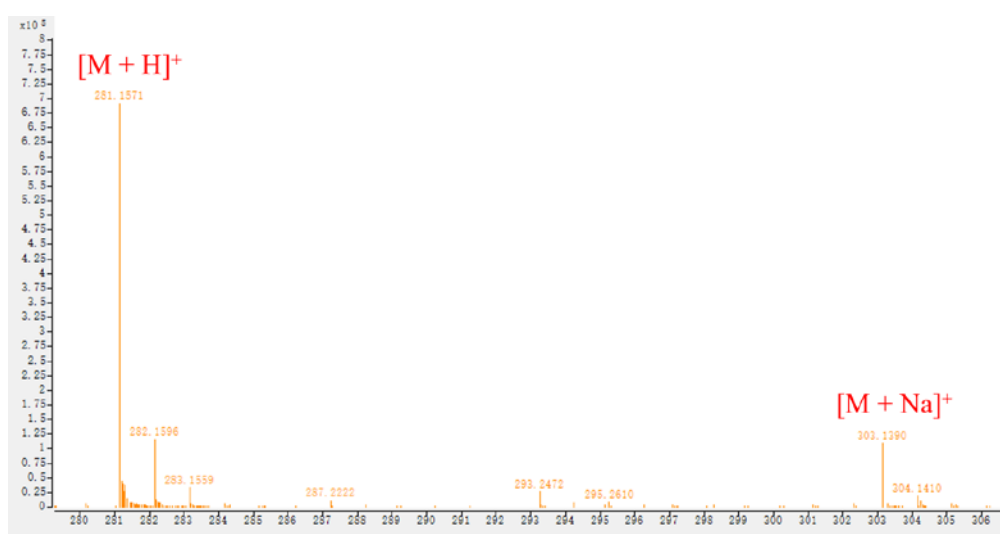

Figure S1. HRESIMS spectrum of compound 1.

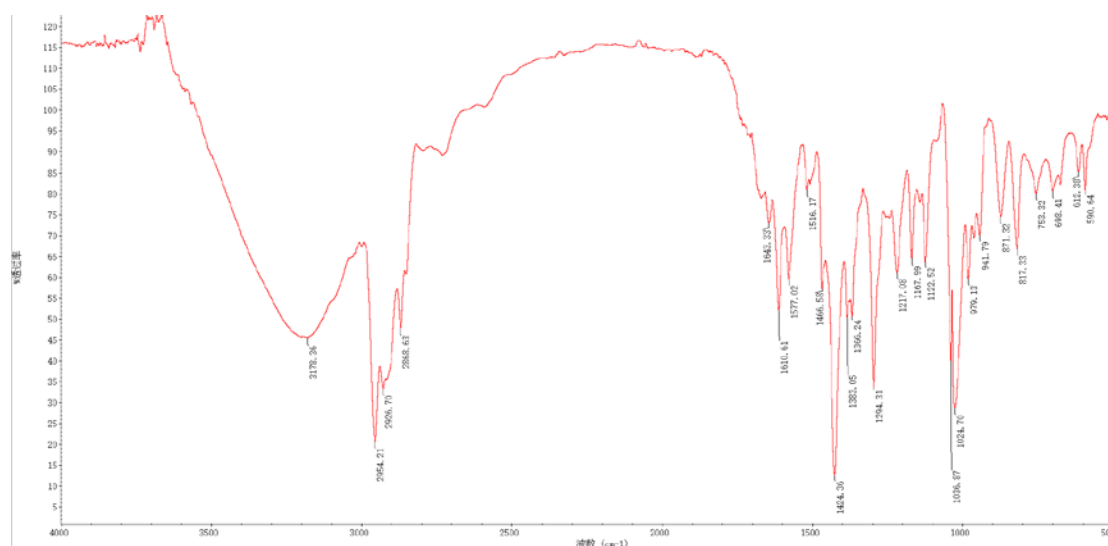

**Figure S2.** IR spectrum of compound **1**.

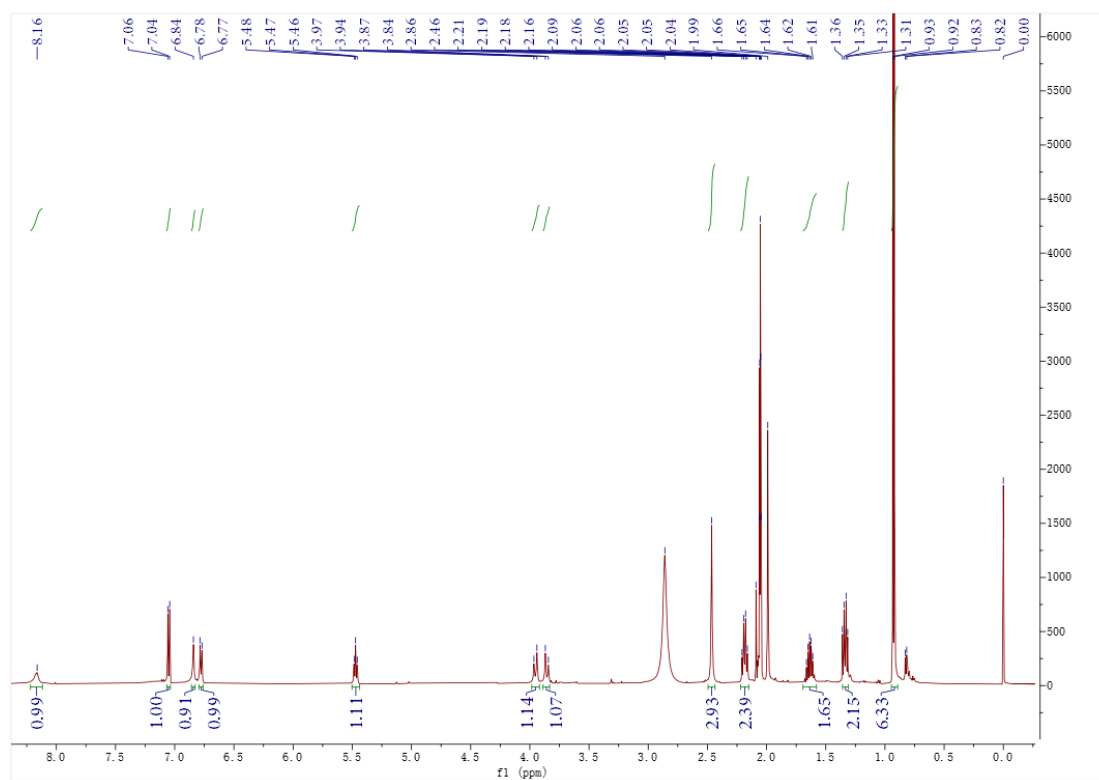

**Figure S3.** <sup>1</sup>H NMR (500 MHz, acetone-*d*<sub>6</sub>) spectrum of compound **1**.

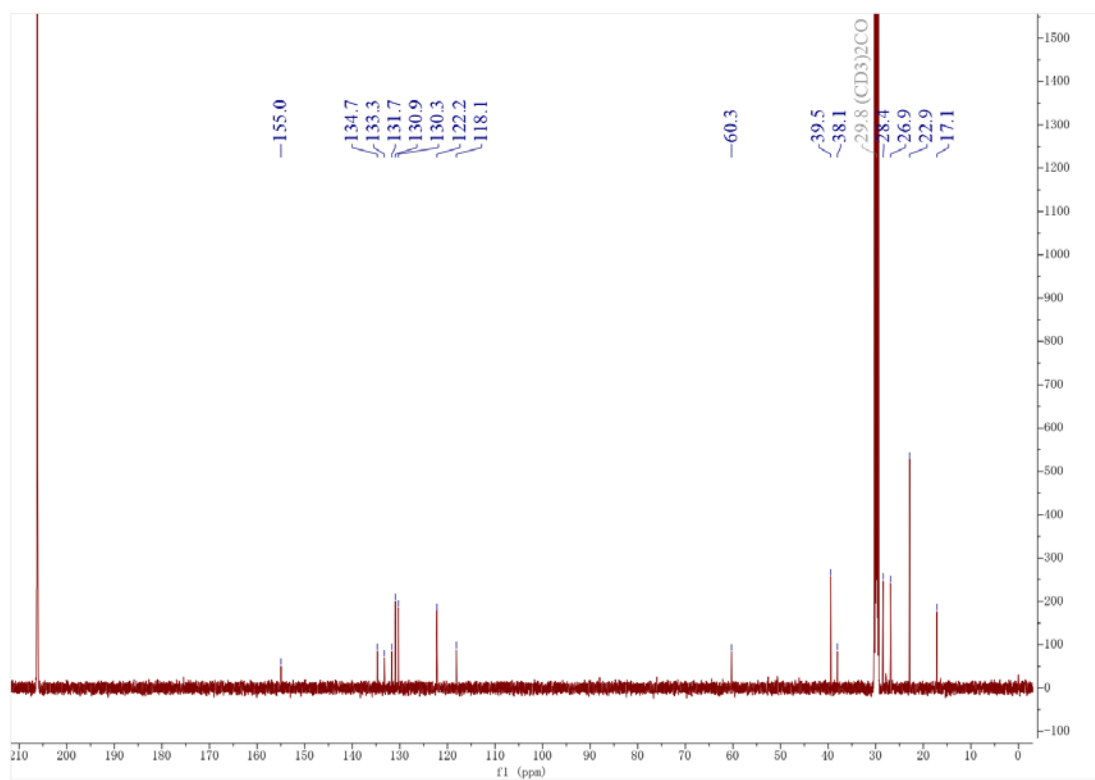

**Figure S4.** <sup>13</sup>C NMR (125 MHz, acetone-*d*<sub>6</sub>) spectrum of compound 1.

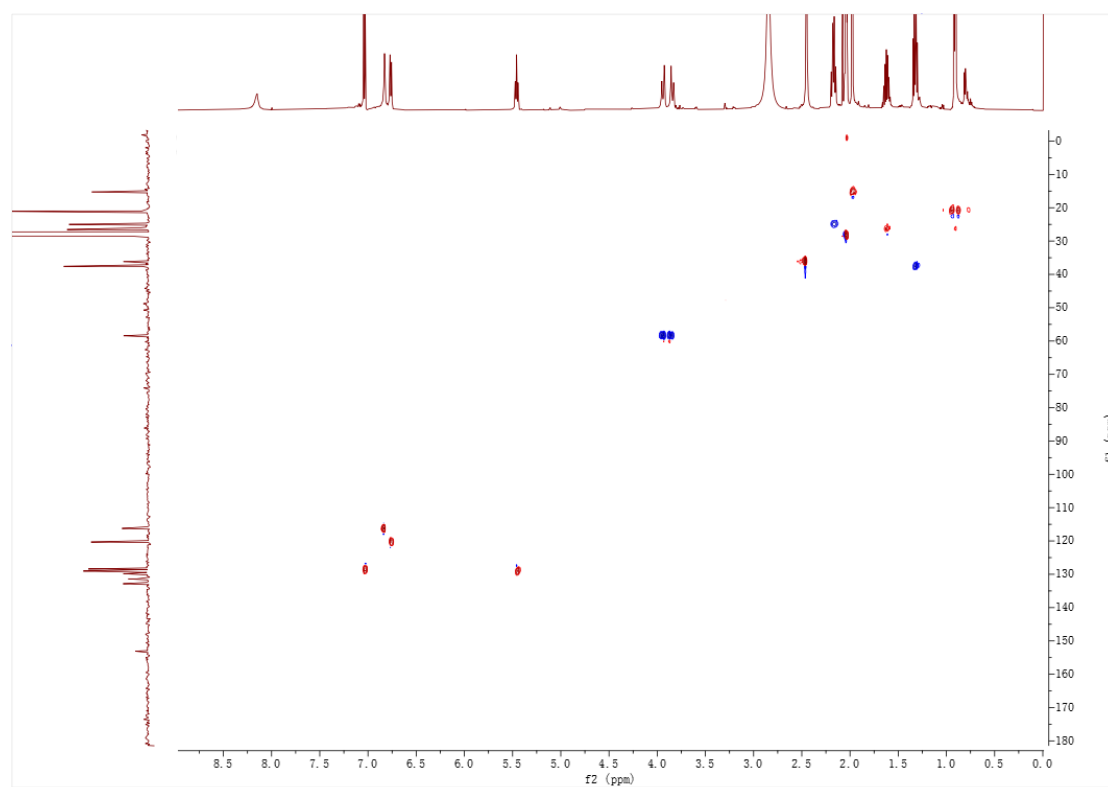

**Figure S5.** HSQC spectrum of compound **1**.

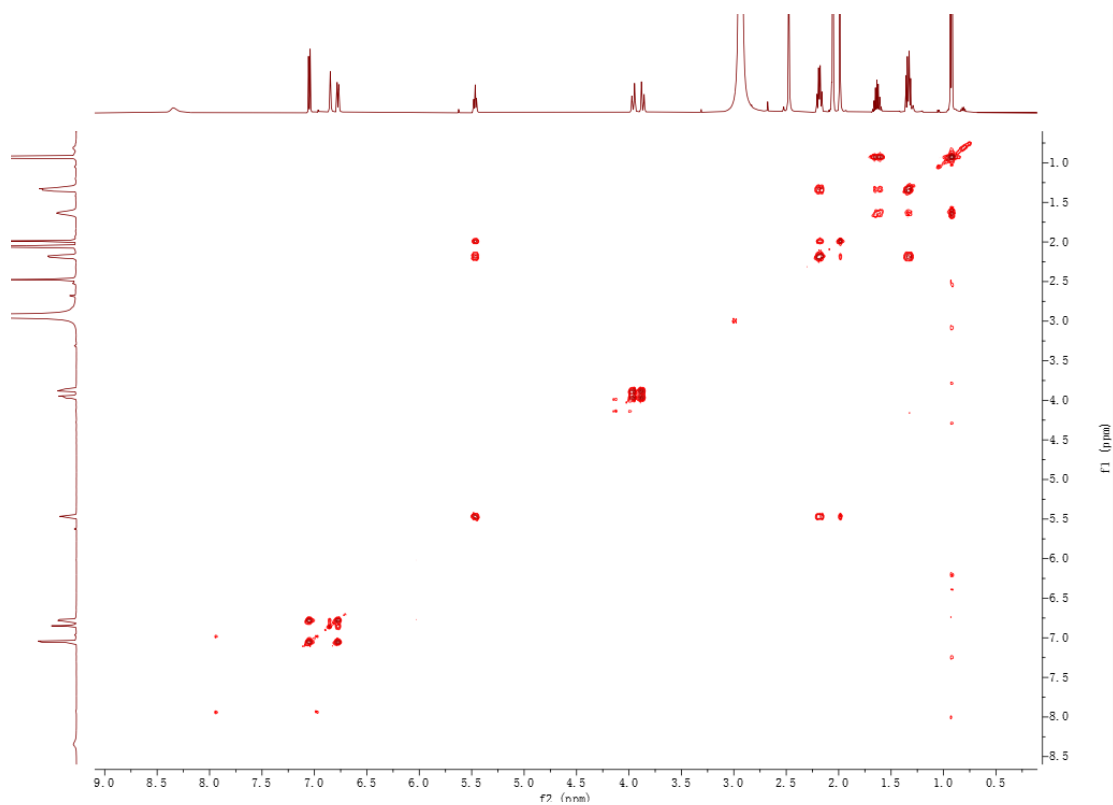

**Figure S6.**  $^1\text{H}$ - $^1\text{H}$  COSY spectrum of compound 1.

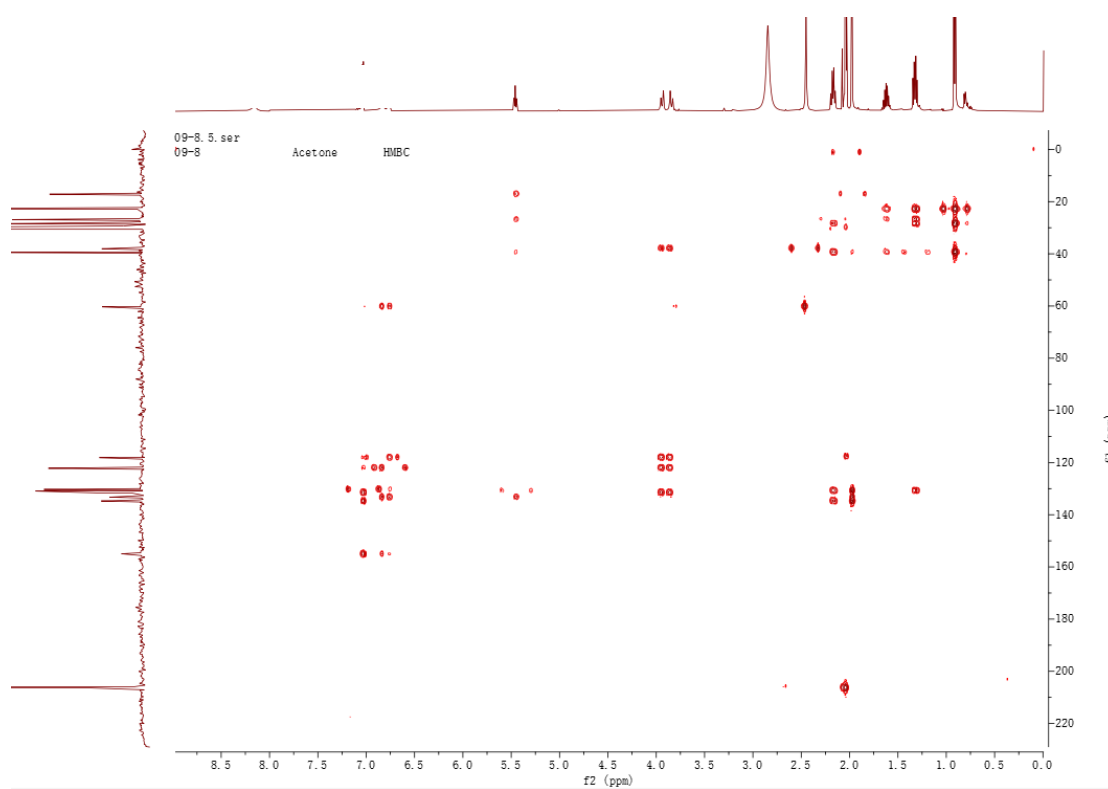

**Figure S7.** HMBC spectrum of compound **1**.



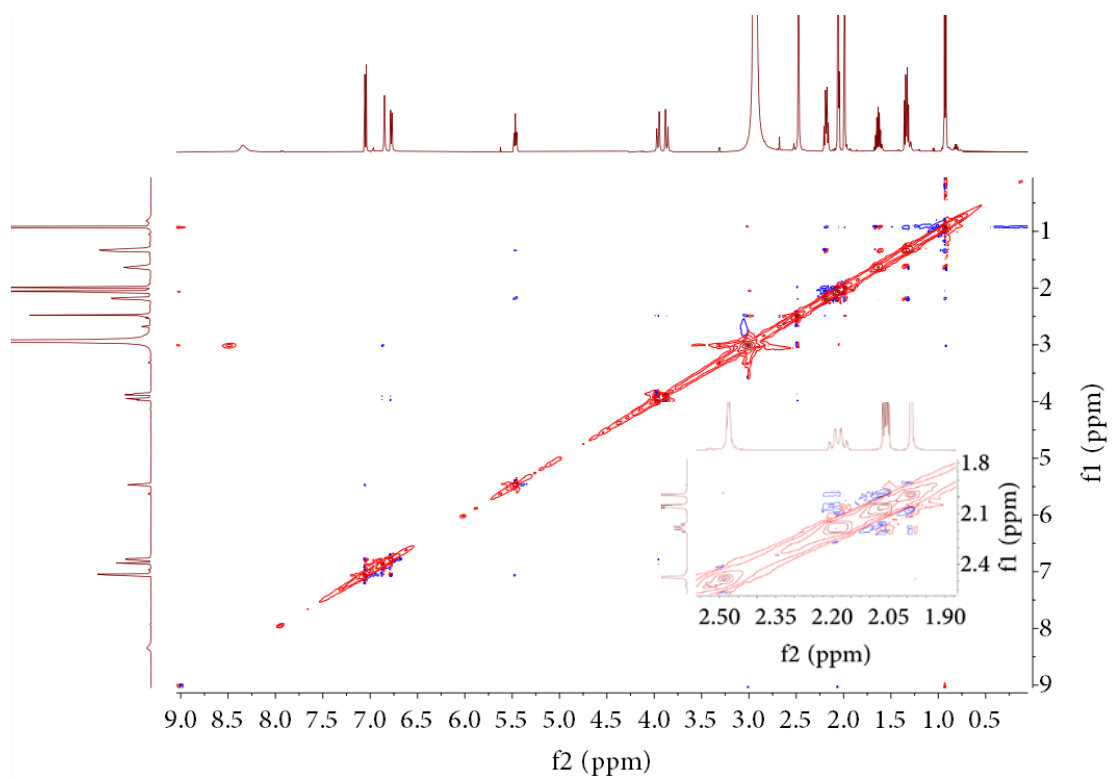

**Figure S8.** NOESY spectrum of compound **1**.

| 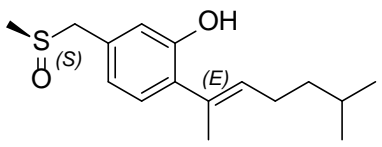   |                 |
|-------------------------------------------------------------------------------------|-----------------|
| Conformers                                                                          | Populations (%) |
|    | 1.99            |
|   | 1.82            |
|  | 1.31            |
|  | 4.31            |

|                                                                                     |      |
|-------------------------------------------------------------------------------------|------|
| 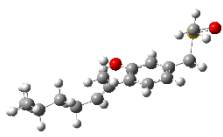   | 4.55 |
|    | 4.13 |
|   | 3.98 |
|  | 2.01 |
|  | 4.62 |

|                                                                                     |      |
|-------------------------------------------------------------------------------------|------|
| 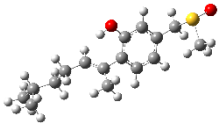   | 4.31 |
|    | 4.12 |
|   | 3.88 |
|  | 1.22 |
|  | 1.13 |

|                                                                                     |      |
|-------------------------------------------------------------------------------------|------|
| 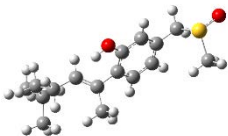   | 1.99 |
|    | 2.11 |
|   | 4.33 |
|  | 4.03 |
|  | 4.49 |

|                                                                                     |      |
|-------------------------------------------------------------------------------------|------|
| 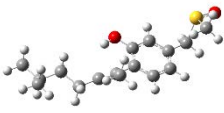   | 4.24 |
|    | 4.26 |
|   | 3.9  |
|  | 3.97 |
|  | 4.36 |

|                                                                                     |      |
|-------------------------------------------------------------------------------------|------|
|    | 4.31 |
|    | 1.45 |
|   | 1.18 |
|  | 1.12 |
|  | 3.95 |

|                                                                                   |      |
|-----------------------------------------------------------------------------------|------|
| 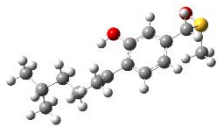 | 3.71 |
|  | 3.2  |

**Figure S9.** ECD conformers of compound **1**.



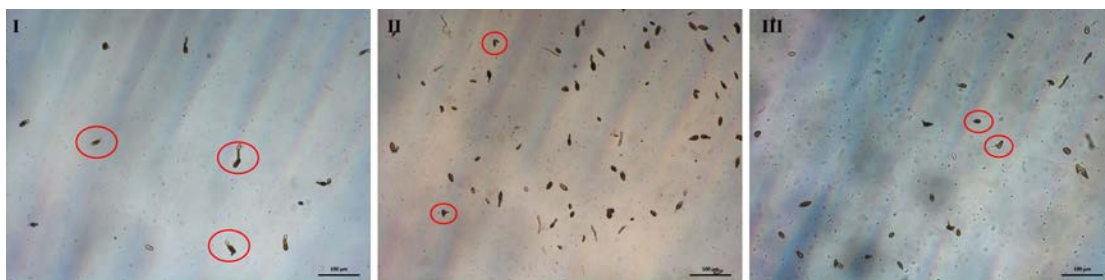

**Figure S10.** Microscopy images of *Alternaria alternata* treated by compounds **2**, **3** and **7** with 128  $\mu\text{g/mL}$  (I–III), the vacuolated germ tubes were circled.

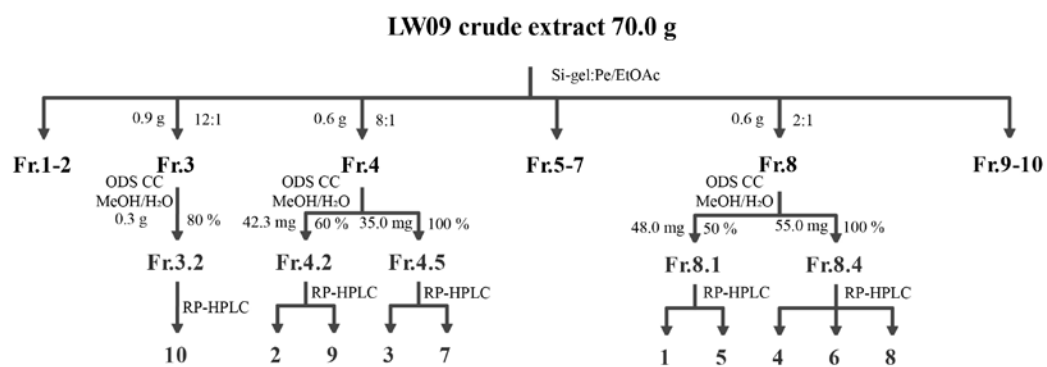

**Figure S11.** Flowchart of the isolation.

**Table S1.** List of specimens and GenBank accession numbers of sequences used in this study.

| Species                    | Collection    | ITS      | BenA     | CaM      |
|----------------------------|---------------|----------|----------|----------|
| <i>Aspergillus amoenus</i> | UTHSC 05-2980 | LN898664 | LN898818 | LN898741 |
| <i>Aspergillus amoenus</i> | UTHSC 06-1721 | LN898665 | LN898819 | LN898742 |
| <i>Aspergillus amoenus</i> | UTHSC 07-1668 | LN898666 | LN898820 | LN898743 |
| <i>Aspergillus amoenus</i> | UTHSC 08-2366 | LN898669 | LN898823 | LN898746 |
| <i>Aspergillus amoenus</i> | UTHSC 11-476  | LN898670 | LN898824 | LN898747 |
| <i>Aspergillus amoenus</i> | UTHSC 11-1419 | LN898671 | LN898825 | LN898748 |
| <i>Aspergillus amoenus</i> | UTHSC 06-4284 | LN898672 | LN898826 | LN898749 |
| <i>Aspergillus amoenus</i> | UTHSC 09-125  | LN898673 | LN898827 | LN898750 |
| <i>Aspergillus amoenus</i> | UTHSC 12-340  | LN898674 | LN898828 | LN898751 |
| <i>Aspergillus amoenus</i> | UTHSC 07-443  | LN898675 | LN898829 | LN898752 |
| <i>Aspergillus amoenus</i> | UTHSC 07-3621 | LN898676 | LN898830 | LN898753 |
| <i>Aspergillus amoenus</i> | UTHSC 09-2582 | LN898677 | LN898831 | LN898754 |
| <i>Aspergillus creber</i>  | UTHSC 14-223  | LN898680 | LN898834 | LN898757 |
| <i>Aspergillus creber</i>  | UTHSC 05-2359 | LN898682 | LN898836 | LN898759 |
| <i>Aspergillus creber</i>  | UTHSC 09-3357 | LN898684 | LN898838 | LN898761 |
| <i>Aspergillus creber</i>  | UTHSC 14-188  | LN898685 | LN898839 | LN898762 |
| <i>Aspergillus creber</i>  | UTHSC 06-3435 | LN898686 | LN898840 | LN898763 |
| <i>Aspergillus creber</i>  | UTHSC 10-1327 | LN898687 | LN898841 | LN898764 |
| <i>Aspergillus creber</i>  | UTHSC 11-2813 | LN898688 | LN898842 | LN898765 |
| <i>Aspergillus creber</i>  | UTHSC 09-2679 | LN898689 | LN898843 | LN898766 |

|                                 |               |          |          |          |
|---------------------------------|---------------|----------|----------|----------|
| <i>Aspergillus creber</i>       | UTHSC 10-639  | LN898690 | LN898844 | LN898767 |
| <i>Aspergillus creber</i>       | UTHSC 04-799  | LN898691 | LN898845 | LN898768 |
| <i>Aspergillus creber</i>       | UTHSC 07-2788 | LN898692 | LN898846 | LN898769 |
| <i>Aspergillus creber</i>       | UTHSC 04-434  | LN898693 | LN898847 | LN898770 |
| <i>Aspergillus creber</i>       | UTHSC 10-582  | LN898694 | LN898848 | LN898771 |
| <i>Aspergillus cvjetkovicii</i> | UTHSC 10-479  | LN898695 | LN898849 | LN898772 |
| <i>Aspergillus jensenii</i>     | UTHSC 05-3600 | LN898698 | LN898852 | LN898775 |
| <i>Aspergillus jensenii</i>     | UTHSC 09-2299 | LN898699 | LN898853 | LN898776 |
| <i>Aspergillus jensenii</i>     | UTHSC 10-327  | LN898700 | LN898854 | LN898777 |
| <i>Aspergillus jensenii</i>     | UTHSC 12-79   | LN898701 | LN898855 | LN898778 |
| <i>Aspergillus jensenii</i>     | UTHSC 07-3790 | LN898702 | LN898856 | LN898779 |
| <i>Aspergillus jensenii</i>     | UTHSC 10-71   | LN898703 | LN898857 | LN898780 |
| <i>Aspergillus jensenii</i>     | UTHSC 09-425  | LN898704 | LN898858 | LN898781 |
| <i>Aspergillus protuberus</i>   | UTHSC 06-4104 | LN898705 | LN898859 | LN898782 |
| <i>Aspergillus protuberus</i>   | UTHSC 09-246  | LN898706 | LN898860 | LN898783 |
| <i>Aspergillus protuberus</i>   | UTHSC 11-269  | LN898707 | LN898861 | LN898784 |
| <i>Aspergillus protuberus</i>   | UTHSC 07-2433 | LN898708 | LN898862 | LN898785 |
| <i>Aspergillus protuberus</i>   | UTHSC 08-3392 | LN898709 | LN898863 | LN898786 |
| <i>Aspergillus protuberus</i>   | UTHSC 11-2175 | LN898710 | LN898864 | LN898787 |
| <i>Aspergillus protuberus</i>   | UTHSC 12-338  | LN898711 | LN898865 | LN898788 |
| <i>Aspergillus protuberus</i>   | UTHSC 12-256  | LN898712 | LN898866 | LN898789 |
| <i>Aspergillus protuberus</i>   | UTHSC 06-2837 | LN898713 | LN898867 | LN898790 |

|                                 |               |          |          |          |
|---------------------------------|---------------|----------|----------|----------|
| <i>Aspergillus protuberus</i>   | UTHSC 08-1574 | LN898714 | LN898868 | LN898791 |
| <i>Aspergillus puulaauensis</i> | UTHSC 11-1436 | LN898715 | LN898869 | LN898792 |
| <i>Aspergillus sydowii</i>      | UTHSC 09-48   | LN898716 | LN898870 | LN898793 |
| <i>Aspergillus sydowii</i>      | UTHSC 11-204  | LN898717 | LN898871 | LN898794 |
| <i>Aspergillus sydowii</i>      | UTHSC 13-2518 | LN898718 | LN898872 | LN898795 |
| <i>Aspergillus sydowii</i>      | UTHSC 13-2630 | LN898719 | LN898873 | LN898796 |
| <i>Aspergillus sydowii</i>      | UTHSC 06-2186 | LN898720 | LN898874 | LN898797 |
| <i>Aspergillus sydowii</i>      | UTHSC 06-4167 | LN898722 | LN898876 | LN898799 |
| <i>Aspergillus sydowii</i>      | UTHSC 07-1018 | LN898723 | LN898877 | LN898800 |
| <i>Aspergillus sydowii</i>      | UTHSC 09-97   | LN898724 | LN898878 | LN898801 |
| <i>Aspergillus sydowii</i>      | UTHSC 12-934  | LN898725 | LN898879 | LN898802 |
| <i>Aspergillus sydowii</i>      | UTHSC 13-2674 | LN898726 | LN898880 | LN898803 |
| <i>Aspergillus sydowii</i>      | UTHSC 10-1222 | LN898727 | LN898881 | LN898804 |
| <i>Aspergillus sydowii</i>      | UTHSC 10-3180 | LN898728 | LN898882 | LN898805 |
| <i>Aspergillus sydowii</i>      | UTHSC 11-2683 | LN898729 | LN898883 | LN898806 |
| <i>Aspergillus sydowii</i>      | UTHSC 06-727  | LN898730 | LN898884 | LN898807 |
| <i>Aspergillus sydowii</i>      | UTHSC 08-3215 | LN898731 | LN898885 | LN898808 |
| <i>Aspergillus sydowii</i>      | UTHSC 09-1708 | LN898732 | LN898886 | LN898809 |
| <i>Aspergillus sydowii</i>      | UTHSC 12-3109 | LN898733 | LN898887 | LN898810 |
| <i>Aspergillus sydowii</i>      | UTHSC 08-865  | LN898734 | LN898888 | LN898811 |
| <i>Aspergillus sydowii</i>      | FMR 14440     | LN898735 | LN898889 | LN898812 |
| <i>Aspergillus tabacinus</i>    | UTHSC 03-1197 | LN898736 | LN898890 | LN898813 |
| <i>Aspergillus tabacinus</i>    | UTHSC 07-2427 | LN898737 | LN898891 | LN898814 |

---

|                                     |               |            |            |            |
|-------------------------------------|---------------|------------|------------|------------|
| <i>Aspergillus tabacinus</i>        | UTHSC 10-1677 | LN898738   | LN898892   | LN898815   |
| <i>Aspergillus tabacinus</i>        | UTHSC 08-2898 | LN898739   | LN898893   | LN898816   |
| <i>Aspergillus versicolor</i>       | UTHSC 03-3679 | LN898740   | LN898894   | LN898817   |
| <i>Aspergillus aurantiobrunneus</i> | NRRL 4545     | EF652465.1 | EF652289.1 | EF652377.1 |

---
